# Supplementary material for: Cooperative recruitment of Yan via a high-affinity ETS supersite organizes repression to confer specificity and robustness to cardiac cell fate specification
Source: PubMed Central journal article supplement — Genes Dev. 2018 Mar 1;32(5-6):389–401. doi: 10.1101/gad.307132.117 (PMC5900712; doi:10.1101/gad.307132.117), 2018-03-01
Supplement: supp_gad.307132.117_Supplemental_Figures.pdf [file supp_gad.307132.117_Supplemental_Figures.pdf]

Boisclair Lachance\_Supplemental Fig. S1

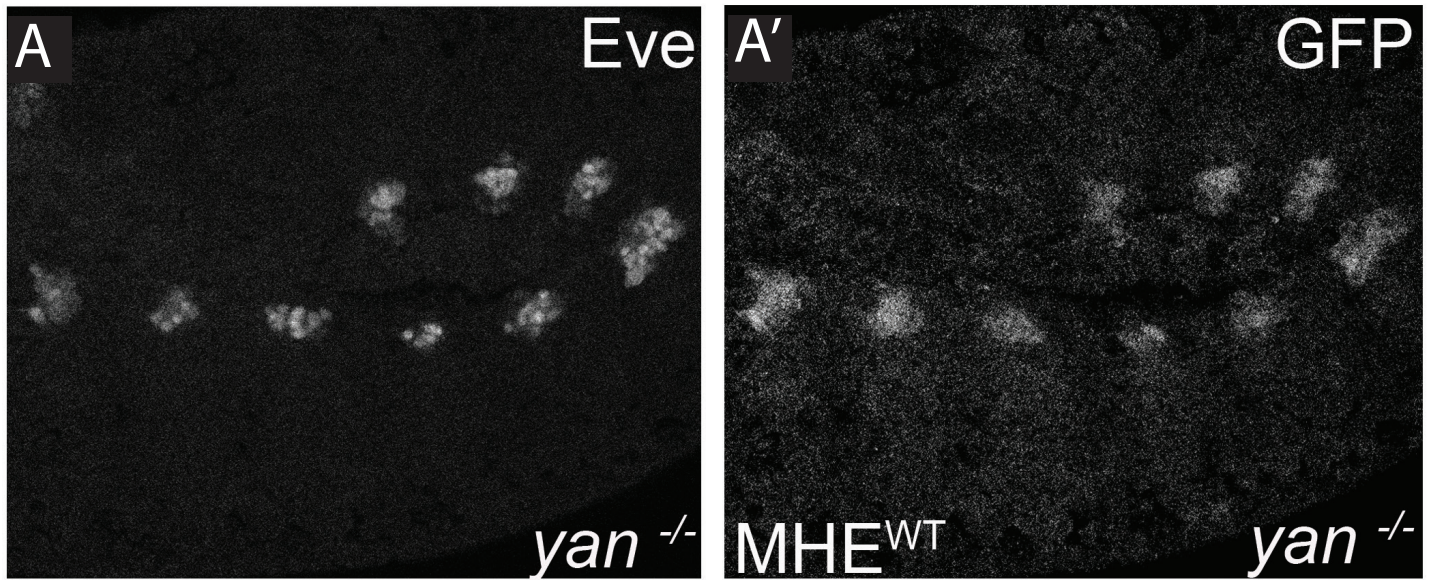

# Boisclair Lachance\_Supplemental Fig. S2

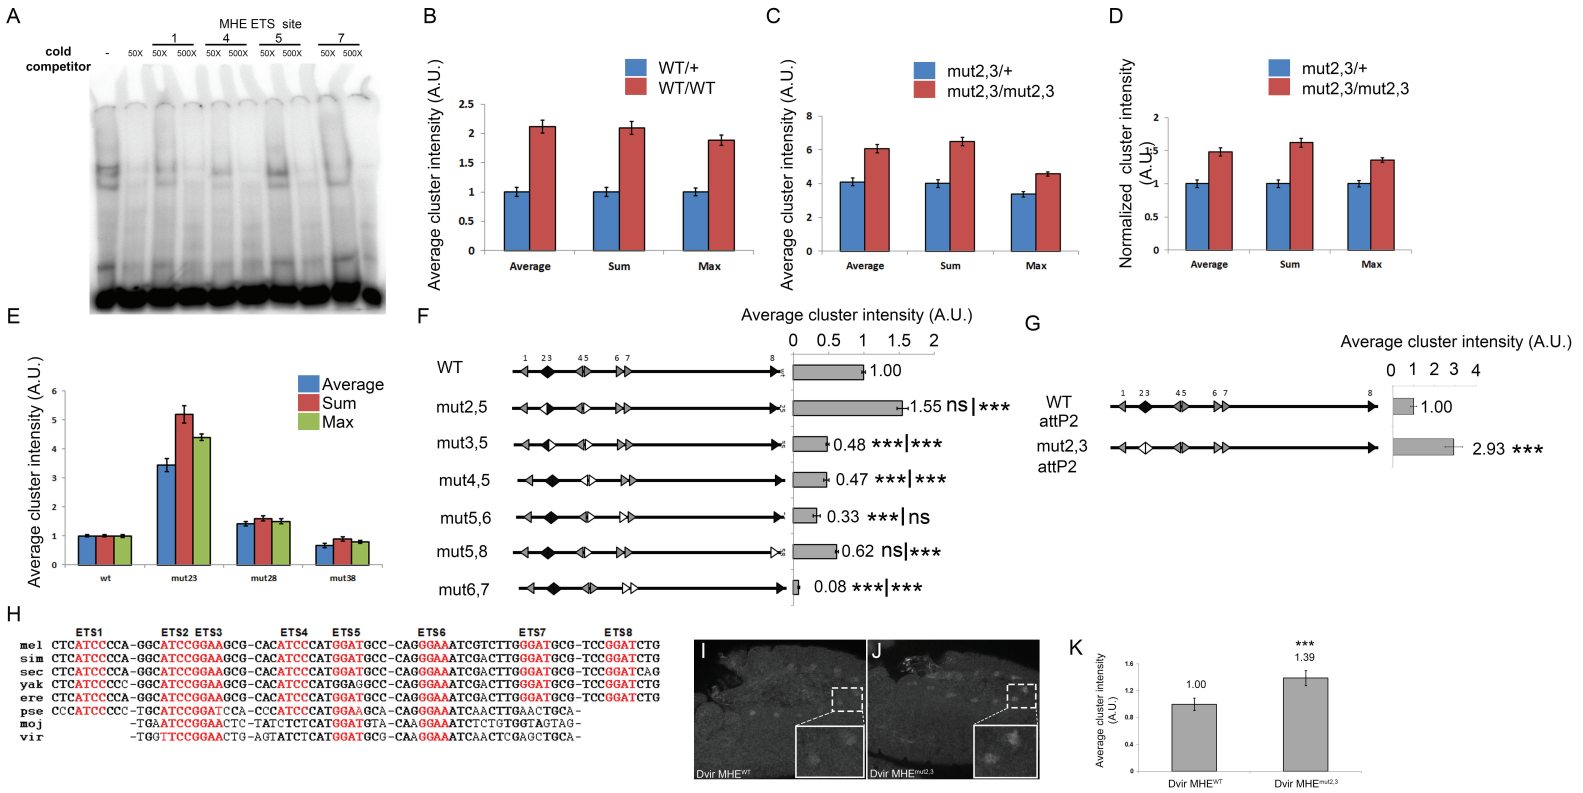

**L**

**D. mel>MHE**

GGATCCGCTCCCACT**CATCC**CCATTGGCGGCTGGGAGAGTCGTTGGGC**ATCCGGAA**CGGGGGCAGCCAAAAATATACCC  
AC**ATCC**CAT**GGAT**GCCATCAATTAGCATACAATTAATAAATGCTTAAACAG**GGAA**ATCGACTT**GGAT**GCGAGTGGTTCG  
CGCCGAGATGCAGCCGAGCAGCATTGTATCTCCAAGTGGCGGGCAGCAGATCAAAGCGACGACAACATAATTGCTGCT  
TCAC**TT**CACAGT**TCT**CAGGC**ACT**TAAGATATGATATGTATGTTGCATACATATCTATTGCGAGTCC**GGAT**CTGCAGCT

**D. sim>MHE**

GCTCCCACT**CATCC**CCATTGGCGGCTGGGAGAGTCGTTGGGC**ATCCGGAA**CGGGGGCAGCCAAAAATATACCC**CATCC**  
CAT**GGAT**GCCATCAATTAGCATACAATTAATAAATGCTTAAACAG**GGAA**ATCGACTT**GGAT**GCGAGTGGTTCGGCCGCA  
GATGCAGCCGAGCCGACTTGTATCTCCAAGTGGCGGGCAGCAGATCAAAGCGACGACAACATAATTGCTGCTTCACTT  
CACAGT**TCT**CAGGC**ACT**TAAGATATGATATGTTGCATACATAGCTATTGCGAGTCC**GGAT**CTGCAGCT

**D. sec>MHE**

GCTCCCACT**CATCC**CCATTGGCGGCTGGGAGAGTCGTTGGGC**ATCCGGAA**CGGGGGCAGCCAAAAATATACCC**CATCC**  
CAT**GGAT**GCCATCAATTAGCATACAATTAATAAATGCTTAAACAG**GGAA**ATCGACTT**GGAT**GCGAGTGGTTCGGCCGCA  
GATGCAGCCGAGCCGACTTGTATCTCCAAGTGGCGGGCAGCAGATCAAAGCGACGACAACATAATTGCTGCTTCACTT  
CACAGT**TCT**CAGGC**ACT**TAAGATATGATATGTTGCATACATAGCTATTGCGAGTCC**GGAT**CAGCTTCCCC

**D. yak>MHE**

CCCACT**CATCC**CCATTGGCAGCTAGGAGACTCGATGGGC**ATCCGGAA**CGGG**GGAA**GCCAAAAATATACCC**CATCC**CA  
TGGAGGCCATCAATTAGCATACAATTAATAAATGCTTAAACAG**GGAA**ATCGACTT**GGAT**GCGAGTGGTTAGGCCACAGA  
TGCAGCCGAGCCGCAACAGCATTGTATCTCCAAGTGGCGGGCAGCAGATCAAAGCGACGACAACATAATTGCTGCTTCACTT  
ACTT**CAC**AGT**TCT**CAGGC**ACT**TAAGATCTGTATGTTGCATATATAGCTGTTGCGAGTCC**GGAT**CTGCAGC

**D. ere>MHE**

GATGGATAAACTTCTTAATGCGATGCGGCTCAAATGGCTCCCACT**CATCC**CCATTGGCAGCTATGGCATTGGAGA  
CTCGATGGG**CATCCGGAA**CGGG**GGAA**GCCAAAAATATACACAC**ATCC**CAT**GGAT**GCCATCAATTAGCATACAATTA  
AAATGCTTAAACAG**GGAA**ATCGACTT**GGAT**GCGAGTGGTTCGGCCACAGATGCAGCCGCAACAGCATTGTATCTCAA  
GTGGCGGGCAGCAGATCAAAGCGACGACAACATAATTGCTGCTTCACTT**CAC**AGT**TCT**CAGGC**ACT**TAAGATATGATATG  
TGATATGTACAGCATATATAGCTATTGCGAGTCC**GGAT**CTGCAGC

**D. pse>MHE**

CC**CATCC**CCCATTGGCAGCTGG**GGAA**TGC**ATCCGGAT**CCGAAAT**ATCC**CATCC**ATGGAA**GCAGCCATCAATTAGCATA  
CAATTAAGAATGCTTAAACAG**GGAA**ATCAACTTGAAGTGCAGCCCGAGATCGGGCAGATACATATGTATCTGTATCTGT  
ATCTGGGACTGTAAGTGGCAACGGCTGCGGCTGGGAGCAGATCAAAGCGACGACAACATAATTGCTGCTTCACTT**CAC**AG  
TTTT**TCGG**AGCAC**ACT**TAAGCAGATACACACACATACCGCATATTACATATTGTATCTGCATCTTCC

**D. moj>MHE**

GCCCCCTCCACTGCCACGCTGCCAGCTGCTTCAATGAAATGACGTAGAAAAATGAATTCAAATGT**GAATCCGGAA**CTC  
TGAGCCAAATATAGCTCAAGTCTTTGAGTATCTCTCAT**GGAT**GAGCTCTCAGTGACAAATGCATCAATTAGCATACAAT  
TAAAAATGCTTAAACAG**GGAA**ATCAACAGCAGCAGATGCACAGCAGCTCAGTCCATGTAGCTGATG**AGGAT**GTAT  
CTGTGGTAGTGCATCTGTATCTTACAGATGCGTCTGTAAGTGGTTCGAGATCAAAGCGACGACGACAACATAATTG  
CTGTT**CAC**TT**CAC**AGT**TTT**CTGTAGACTTGCAGATGGCCACAGCAA**ACT**TAATGCTCCATATATATTTCGGCTGCAC  
TGTGAGAA

**D. vir>MHE**

TAAATGACCCAGCAGCCTCCCCCGCCTCTCCCCCTGCACACCAGCCGAGCTGGCATTGAAATGCCATCAGAATA  
TGG**TCCGGAA**CTGTGCGCAAAATATAGTACAAGTATCTTTGAGTATCTCAT**GGAT**GCGCAACGGTTTTGTGACAATGCA  
ATCAATTAGCATACAATTAATAAATGCTTAAACAG**GGAA**ATCAACTCGAGCTGCAGACGACACACAGCCTTATTTGTAT  
CTGTATCTAATGCGGGCGCAACTGTATCTGTATCTGCATCTGTATCTCTGTCTGTGTCTGTGAGATGCGCTTGT  
AAGTGGCCGAGATCAAAGCGACGACGACAACATAATTGCTGTTCACTT**CAC**AGT**TTTT**TGTAGACTTGCAGATGGCC  
ACAGCAA**ACT**TAATGCTCCATATATTT**CAG**T**CACT**GCAAA

A

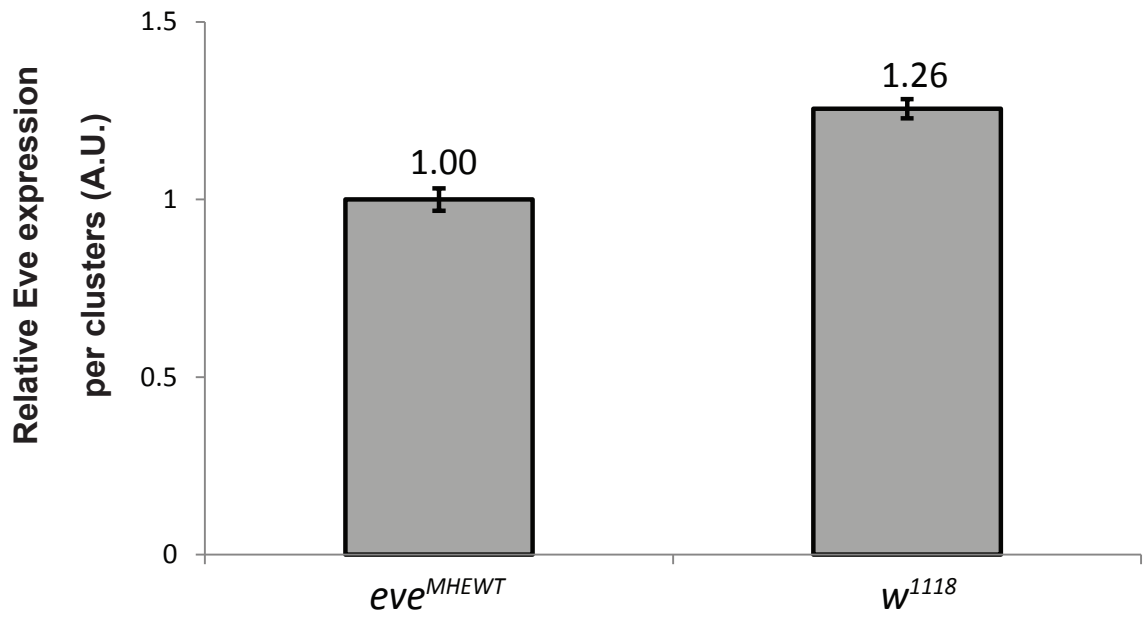

# Boisclair Lachance\_Supplemental Fig. S4

## A

|                    |                                                           |
|--------------------|-----------------------------------------------------------|
| Product Version    | E 5520 - NEBuilder High-Fidelity DNA Assembly Cloning Kit |
| No. of Fragments   | 2-3 fragments (including vector)                          |
| Construct Length   | less than 10 Kb                                           |
| Min. Overlap       | 25 bp                                                     |
| PCR Polymerase     | Q5 High-Fidelity DNA Polymerase                           |
| PCR Primer Conc.   | 500 nM                                                    |
| Min. Primer Length | 19 nt                                                     |

Vector Digestion

Vector backbone digested with SnaBI and NruI

Fragment Arrangement

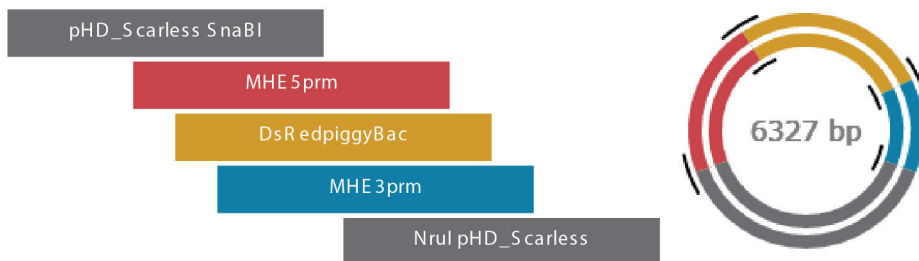

Required Primers

| Overlaps      | Oligo (Uppercase = gene-specific primer)      | Anneals       | F/R | 3' T <sub>m</sub> | 3' T <sub>a</sub> * | 6-Frame              |
|---------------|-----------------------------------------------|---------------|-----|-------------------|---------------------|----------------------|
| pHD_Scarless  | agtatttattatgcatttagaatacGAAGCGGAACAGAATGCCA  | MHE 5prm      | Fwd | 63.5°C            | 62.9°C              | <a href="#">view</a> |
| DsRedpiggyBac | tttctagggttaaTTAAGGACAACCTCTCAAGTG            | MHE 5prm      | Rev | 59.9°C            | 62.9°C              | <a href="#">view</a> |
| MHE 5prm      | agttgtcctttaTTAACCTAGAAAGATAATCATATTG         | DsRedpiggyBac | Fwd | 55.5°C            | 58.5°C              | <a href="#">view</a> |
| MHE 3prm      | tacccattaaaggtaccTTAACCTAGAAAGATAGTCTG        | DsRedpiggyBac | Rev | 55.8°C            | 58.5°C              | <a href="#">view</a> |
| DsRedpiggyBac | tttctagggttaaaggtaccTTAATGGTGAGGCGCGGA        | MHE 3prm      | Fwd | 67.4°C            | 66.6°C              | <a href="#">view</a> |
| pHD_Scarless  | aattaaccaattctgaacattatcgCTGACAATTAGCCCTGAACC | MHE 3prm      | Rev | 63.6°C            | 66.6°C              | <a href="#">view</a> |

# Boisclair Lachance\_Supplemental Fig. S4

## B

TCTTTTTCCGAAGGTAACCTGGCTTCAGCAGAGCGCAGATACCAAATCTGTTCTTCTAGTGTAGCCGTAGTTAGCCCACT  
 ACTTCAAGAACTCTGTAGCACCGCCTACATACCTCGCTCTGCTAATCCTGTTACCAAGTGGCTGCTGCCAGTGGCGATAAG  
 TCGTGTCTTACCGGGTTGGACTCAAGAGCATAGTTACCGGATAAAGCGCGAGCGGTGGGCTGAACGGGGGGTTCGTGCAC  
 ACAGCCCAGCTTGGAGCGAACGACCTACCCGAACCTGAGATACCTACAGCGTGTAGCTATGAGAAAAGCGCCACGCTTCCCG  
 AAGGAGAAAAGCGGACAGGTATCCGGTAAGCGGAGGGTGGAAACAGGAGAGCCGACGAGGGAGCTTCCAGGGGAAAC  
 GCCTGGTATCTTTATAGTCTGTGGGTTTCGCCACCTCTGACTTGTAGCGTGCATTTTTGTGATGCTCGTCAGGGGGGCG  
 GAGCCATGGAAAAACGCCAGCAACCGCGCCTTTTTACGGTTCCTGGCCCTTTTGTGCTGCTCACATGTTCTTTTC  
 CTGGCTTATCCCTGATTTCTGTGGATAACCGTATTACCGCCTTTGAGTGTAGCTATCCGCTCGCCGACGCCAAGACC  
 GAGCGCAGCGAGTCACTGAGCGAGGAAGCGGAAGCGGAGTAGGGAAGTGCAGGCATCAAACCTAAGCAGAAGGCCCT  
 GACGGATGGCCCTTTTGTGCTTCTACAACTCTTCTGTGTTGTAACACGACGGCCAGTCTTAAAGCTCGGGCCCTGGG  
 CGGTTCTGATAACGAGTAATCGTTAATCCGCAAAACAGTAAAAACCCGCTTCGGCGGGTTTTTTTATGGGGGAGTTTA  
 GGGAAAGAGCATTTGTAGAAATTTAAGGGCGCCTGTCACCTTTGCTGATATATGAGAATTTTAACTTATAAATGA  
 GAAAAAGCAACGCACTTTAAATAAGATACGTTGCTTTTTCGATTGATGAACACCTATAAATAAACTATTCATCTATTAT  
 TTATGATTTTTGTATATACAATTTCTAGTTTGTAAAGAGAATTAAGAAAAATAAATCTCGAAAAATAAAGGGAAA  
 ATCGATTTTTGATATCAAATTTATACATGTCACAGATAATAACAAAATAAATACAAACTATAAGATGTTATCAGTATTTA  
 TTATGCATTTAGAATACGAAGCGGAACAGAAATGCCAAGATGGTCAAGATCTCGGGACCTCTCTTTTGGCCAGGGGGCGTA  
 AAAAAATGACTCGCTCGGGTCCGCGGAATATTTTTAAATCTGACTTCCAACTCTGATCTGGGTTGCAATCGTA  
 AAAAAAGCAGAAACAAAGCGGCACTTTTCTCGGCAATGATCTGTTAATGGCGGGTAAAAAATAAGTACAA  
 AGTCAAGGTTGTCCGTAATTTGACCCGGTTAAGATGTCTGTCTGACCGAGAAGGATCGAGACATTAGCACTTC  
 AAAGTCCACCGCTCGAAGGATTCGCCGAAGATTCACACGGCTGGCGGGGGGATCAACGTTTGTGATGAGAAACCGCGC  
 CGCGCTGTAAACGGCCAAAAAGCAAGTGCATGCAATTTAGGCAGATTACTGCTGGCCAGCAAGGTCAGGCCGCCCT  
 AATGGCGTACCGCTGACTTACCTCCTCCACCCCTGCCCTTCAACGGCAAGGAACCGCAACGGCAGCAATACG  
 ATCACCACAACCCGATCGATCGATCGAGTACCTTCGACCTTGGC**CATTGTTATCTGGTCTGC**GATTTTTTTCTTCA  
 TTTTTACAGGCCATTTGGCTGCGCTCCTGCTGTCTTGGTGTGCTTTTACGATGCGTGTCTTTTAGCATGCTAAA  
 AATCAAGCGATCAAGAACTCGCGGATCTAGCCGGAATCGGGATAGTCGTTTATGGCCACGCCCTCAATCTCCATA  
 AAACACTAAGCGCTTTCGCTAATGTATGTATCTCTTCATATCTGGAATCTCACTATGGGTGTGGGTGTGGGTATCTGT  
 ATCTGTACTATATCTGTGTGTGATGATAAATAAATCTTAAATGGGATGCTGCTCAAAATGGCTCCCACTCGAAATTC  
 ATTGCGCGTGGAGAGTCTGTTGGC**ACTCCGGAACCG**GGGGCAGCAAAAATAACCCACATCCCACTGGATGCCATCAAT  
 TAGCATACAATAAAAAATGCTTAAACAGGGAATCGTCTTGGGATGCGAGTGGTTCGGCCGAGATCGACCGCAGCAG  
 CATTGTATCTCCAAGTGGCGGCGCAGCAGATCAAAGCAGCACAACATAAATGCTGCTTCACTTACAGTTCTCAGGCAC  
 TTAAGATATACATATGTATGTTGCATACATATCTATTGCGAGTCCGGATCTGCAGCTTCCCTATCGATCTTCACTAGTT  
 TTTGCTGACTGACTGACTGCGGTGGGCCCTTGAAGAAGCCTAGCGCTGCTAATTTAGATCGCGGGGATCCTTTGGAT  
 GCCACTTGGAGGATGTCCTTTAATTAACCTAGAAAGATAATCATATTGTGACGTACGTTAAAGATAAATCATGCGTAA  
 AATTGACCATGTGTTTTATCGGTCTGTATATCGAGGTTTTATTTAATTTGAATAGATATTAAGTTTTATTATATTTA  
 CACTTACGATTAATTAATAATTCACAAACAAATTTATTTATGTTTATTTATTTAATAAAAAAACAACAACTCAAAAT  
 TTCTTCTATAAAGTAACAAACTTTTAGGATCTAATTCATTTAGAGACTAATTCATTTAGAGCTAATTCATTTAGGATCC  
 AAGCTTTCGATTTTCGAACCTTCGACCCCGGAGTATAAATAGAGGCGCTTCGCTACGGAGCGACAATTCATTTCAAAC  
 AAGCAAAGTGAACAGCTGCTTAAGCGAAGCTTAAGCAAATAAACAAAGCGACTGAACAGCTAACAACATCGGCTCGAAG  
 CCGGTGCGCCACATGGCTCCTCCGAGGACGTCATCAAGGATTCATGCGCTTCAAGGTGCGCATGGAGGGTCCGTGAA  
 CGGCCACGAGTTCGAGATCGAGGGCGAGGGCGAGGGCGCCCTACGAGGGACCCAGACCGCCAAGCTGAAGTGAACCA  
 AGGGCGGCCCTGCCCTTCGCTGGGCACTCTGTCCCCCACTTCAGTACGGCTCCAAGGTGACGTGAAGCACCC  
 CGGCACATCCCGACTCAAGAAGCTGTCCTTCCCGAGGGCTTCAAGTGGGAGCGCTGATGAACCTCGAGGCGGGCG  
 CGTGGTGACCGTGACCCAGGACTCCTCCCTCCAGGACGGCTCCTTCATCTACAAGTGAAGTTCATCGGGTGAACCTCC  
 CTTCCGACGGCCCGTAATGCAAGAAGAAGCATGGGCTGGGAGGCGTCCACGGAGCGCCTGTACCCCGCGACGGCGTG  
 TGAAGGCGAGATCCCAAGGCCCTGAAGCTGAAGGAGCGCGCCACTACCTGTGGAGTTCAAGTCCATCTACATGCG  
 CAAGAAGCCCGTGCAGTCCCGGCTACTACTAGTGGACTCCAAGTGGACATCACTCCCAACGAGGACTACACCA  
 TCGTGGAGCAGTACGAGCGCGCGAGGGCCGCCACCACTGTTCTGTAGCGCGCGACTAGATCATAATCAGCCAT  
 ACCACATTTGTAGAGTTTACTTGTCTTAAAAAACCCTCCACACCTCCCAAGCTGAACATAAAAATGAATGCAAT  
 TGTGTTGTTAACTTGTTTATGACGTTATAATGGTTACAAATAAAGCAATAGCATCACAATTTCAAAATAAAGCAT  
 TTTTTTCACTGATCTAGTTGTGGTTGTGCCAACTCATCAATGATCTTAGATATCTATAACAGAAAAATATATATAT  
 AATAAGTTATCACGTAAGTAGAACATGAAATAACAAATAAATATCTGATGAGTTAACTTAAAAAGTCAAGTAAAGAT  
 AATCAATCGCTCATTTTGACTCACCGGCTGTTATAGTTCAAAATCAGTACACTTCCGCAATGACAAGCACGCTCACG  
 GGAGTCCAAAGCGGCGACTGAGATGCTTAAATGCACAGCGCAGGATTCCGCTATTGAAAGAGAGAGCAATATTTCA  
 AGAATGCATGCGTCAATTTACGCGAGACTCTTTTAGGGTTAAGGTACCTTAAATGGGTGAGGCGCGGAAGTGCAGGAC  
 TTTCTGGTGTCTTGAACGACCG**AGCTGACTAATAACGGAT**CCCAATTTGGGATCGGATATGCAACAACCGG  
 TAATGATAAGCAGGAGGATGCACTGTATCCGTACCTGAGCCACTGATCCCGGCAAGTCCGAGACAATCCACAATAT  
 TGTCAACTCTTTGGCTCTAATCTGAGGCTAATCACTTCCCTGAAATGCATAAATTTGTCGCGGGCTTTTGAATCGCTCT  
 GGCGGAGGGAGATGAGGAAGGATGACCGGAAACCGCAGCAAGTGGCAGTTCGAGATTTGGCAAAATCCGCGAGCGACA  
 ATGCCAGAGAATGGGCAACAAGTAGCGGCAATTAGCAATCCTATCATGCTTTTATGGCCGGCAACTCTTGGCCGCGC  
 ATCTCAGTTCATCCGAAGCGGACAGGTTCCAGGTTCAAGTGCAGGTCAGCTACCCCTGCTATCCCGTCAACCCCTTTAG  
 GGCGATAATCTTCTAATGTTGCATTAATTTGAGGCGTGGACGGATTAGGGCGTGTGGCTGGCGGAACCCGACG  
 AGAAACCGCCGAGGACTGCACCGACTGACCGCTGACGCTACAGATCTCTGATCTTCACTCTAATCTTTGCAATTTG  
 CAACTGACTTCTGCACTGGGTCCGCCCTTAATCTTCCGCGGAGAAGCGGCGAGTTCGCGAGGTTACTGGCCGGGGTAA  
 TGGGATTTATCTGCGATTTCCCCAGATGATCCGAGAAAGTCAATCTGGTTCAAGGGCTAATTTGTGAGCGATAATGTTCA  
 AATGGTTAATTTGGTTGTAACACTGACCCCTATTTGTTTATTTTCTAAATACATTCAAATATGATCCGCTCATGAGAC  
 AATAACCTGATAAATGCTTCAATAATATTGAAAAAGGAAGAATATGAGTATTCACACTTTCCGTGTCGCCCTTATTTCC  
 TTTTTTGGCGATTTTGCCTTCTGTTTGTCTCACCGAAGACGCTGGTGAAGTAAAAATGCTGAAGATCAGTTGGG  
 TGCACGATGGGTTACATCGAACTGAACTGAACTGACCCCTATTTGTTTATTTTCTAAATACATTCAAATATGATCCGCTCATGAGAC  
 TATGAGCACTTTTAAAGTTCTGCTATGTGGCGGATTTATCCCGTATTGACCGCGGCAAGAGCAACTCGGTGCGCCG  
 ATACACTATCTCAGAAATGACTTGGTGTAGTACTCACCAGTACAGAAAGCATCTTACGGATGGCATGACAGTAAGAGA  
 ATATGCACTGCTGCCATAACCATGAGTATAACTGCGGCAACTTACTTCTGACAACGATCGGAGGACCGAAGGAGC  
 TAACCGTTTTTTTGCACAACATGGGGGATCATGTAACTCGCTTACTTCTGGGAAACCGGAGCTGAATGAAGCCATACCA  
 AACGACGAGCGTGACACCCAGATGCTGTAGCGATGGCAACACGCTTGGCAAACTATTAATCTGGCAACTACTTACTCT  
 AGCTTCCCGGCAACAAATTAATAGACTGGATGGAGGGGATAAAGTTGCAGGACCACTTCTGCGCTCGGCCCTTCCGGCTG  
 GCTGGTTAATTTGCTGATAAATCCGGAGCCGGTGGCGTGGTTCTCGCGGATATCATCGAGCGCTGGGGCCAGATGGTAAG  
 CCTCCCGTATCGTAGTTATCTACACGACGGGGAGTCAAGCAACTATGGATGAACGAATAGACAGATCGCTGAGATAGG  
 TGCCCTCACTGATTAAGCATTTGTAAGAAGCAGAGATACGCTGACTTCAAGGAGCGGCGCAAGCTTACGACAAAATCCC  
 TTAACGTTAATTCAGGCGGCTGCTTCCACTGAGCGTCAAGCCCGTAGAACAGATCAAAGGATCTTCTGAGATCTCTT  
 TTTCTGCGGTAATCTGCTGCTTGCAAAACAAAAAACCCCGCTACCAGCGGTGGTTGTTGTTG

pHD-Scarless

MHE-5prm  
PCR AB

DsRedpiggyBac  
PCR EF

MHE-3prm  
PCR CD

pHD-Scarless

Contains Amp<sup>R</sup> gene and origin of replication of pHD-Scarless (all sequence between SnaB1 and NruI)

Guide RNA site 1  
GCC upstream changed to TGC introducing a FspI restriction site

ETS site 2 and 3 mutated to GGCTACCGGCTAG in eve<sup>MHEmut2,3</sup>

Contains the eye marker for identifying successful homologous directed repair events and piggyBac transposable element arms for piggyBac mediated excision of this cassette

Guide RNA site 1  
CGG downstream changed to CCC introducing a BamH1 restriction site

Contains Amp<sup>R</sup> gene and origin of replication of pHD-Scarless (all sequence between SnaB1 and NruI)

# Boisclair Lachance\_Supplementary Table 1

TABLE S1: Mendelian ratio of *eve*<sup>MHEWT</sup> or *eve*<sup>MHEmut23</sup> in the different genotypes shown in Figure 3.

| Genotype                                                                                                         | actual      | expected    |
|------------------------------------------------------------------------------------------------------------------|-------------|-------------|
| <i>eve</i> <sup>MHEWT</sup> /CTG                                                                                 | 71          | 77          |
| <i>eve</i> <sup>MHEWT</sup>                                                                                      | 45          | 39          |
| <b>Total</b>                                                                                                     | <b>116</b>  | <b>116</b>  |
| <i>eve</i> <sup>MHEmut23</sup> /CTG                                                                              | 457         | 461         |
| <i>eve</i> <sup>MHEmut23</sup>                                                                                   | 235         | 231         |
| <b>Total</b>                                                                                                     | <b>692</b>  | <b>692</b>  |
| <i>Pnt-GFP, eve</i> <sup>MHEWT</sup> /CTG                                                                        | 453         | 481         |
| <i>Pnt-GFP, eve</i> <sup>MHEWT</sup>                                                                             | 268         | 240         |
| <b>Total</b>                                                                                                     | <b>721</b>  | <b>721</b>  |
| <i>Pnt-GFP, eve</i> <sup>MHEmut23</sup> /CTG                                                                     | 1067        | 1006        |
| <i>Pnt-GFP, eve</i> <sup>MHEmut23</sup>                                                                          | 442*        | 503         |
| <b>Total</b>                                                                                                     | <b>1509</b> | <b>1509</b> |
| <i>Pnt-GFP, eve</i> <sup>MHEWT</sup> /CTG or <i>yan</i> <sup>E443</sup> , <i>eve</i> <sup>MHEWT</sup> /CTG       | 338         | 367         |
| <i>Pnt-GFP, eve</i> <sup>MHEWT</sup> / <i>yan</i> <sup>E443</sup> , <i>eve</i> <sup>MHEWT</sup>                  | 213         | 184         |
| <b>Total</b>                                                                                                     | <b>551</b>  | <b>551</b>  |
| <i>Pnt-GFP, eve</i> <sup>MHEmut23</sup> /CTG or <i>yan</i> <sup>E443</sup> , <i>eve</i> <sup>MHEmut23</sup> /CTG | 502         | 499         |
| <i>Pnt-GFP, eve</i> <sup>MHEmut23</sup> / <i>yan</i> <sup>ER443</sup> , <i>eve</i> <sup>MHEmut23</sup>           | 246         | 249         |
| <b>Total</b>                                                                                                     | <b>748</b>  | <b>748</b>  |

\* This lower survival of *Pnt-GFP, eve*<sup>MHEmut23</sup> is found significant by chi-square analysis (p=0.000865)
